# Improved prediction of chronological age from DNA methylation limits it as a biomarker of ageing

Qian Zhang<sup>1</sup>, Costanza L. Vallerga<sup>1</sup>, Rosie M Walker<sup>2</sup>, Tian Lin<sup>1</sup>, Anjali K. Henders<sup>1</sup>, Grant W. Montgomery<sup>1</sup>, Ji He<sup>3</sup>, Dongsheng Fan<sup>3</sup>, Javed Fowdar<sup>4</sup>, Martin Kennedy<sup>5</sup>, Toni Pitcher<sup>6,7</sup>, John Pearson<sup>5</sup>, Glenda Halliday<sup>8</sup>, John B. Kwok<sup>8</sup>, Ian Hickie<sup>8</sup>, Simon Lewis<sup>8</sup>, Tim Anderson<sup>6,7</sup>, Peter A. Silburn<sup>9</sup>, George D. Mellick<sup>4</sup>, Sarah E. Harris<sup>2,10</sup>, Paul Redmond<sup>10</sup>, Alison D. Murray<sup>11</sup>, David J. Porteous<sup>2,10</sup>, Christopher S. Haley<sup>12</sup>, Kathryn L. Evans<sup>2</sup>, Andrew M. McIntosh<sup>2,10,13</sup>, Jian Yang<sup>1,9</sup>, Jacob Gratten<sup>1,9</sup>, Riccardo E. Marioni<sup>2,10</sup>, Naomi R. Wray<sup>1,9</sup>, Ian J. Deary<sup>10,14</sup>, Allan F. McRae<sup>1,15</sup>, Peter M. Visscher<sup>1,9,15</sup>

<sup>1</sup> Institute for Molecular Bioscience, The University of Queensland, Brisbane, Queensland 4072, Australia

<sup>2</sup> Centre for Genomic and Experimental Medicine, Institute of Genetics and Molecular Medicine, University of Edinburgh, Edinburgh, EH4 2XU

<sup>3</sup> Department of Neurology, Peking University, Third Hospital, No. 49, North Garden Road, Haidian District, 100191, Beijing, China

<sup>4</sup> Griffith Institute for Drug Discovery (GRIDDD), Griffith University, Brisbane, Australia

<sup>5</sup> Department of Pathology and Biomedical Science, University of Otago, Christchurch, New Zealand

<sup>6</sup> New Zealand Brain Research Institute, Christchurch, New Zealand

<sup>7</sup> Department of Medicine, University of Otago, Christchurch, New Zealand

<sup>8</sup> Brain and Mind Centre, Sydney Medical School, The University of Sydney, Sydney, Australia

<sup>9</sup> Queensland Brain Institute, The University of Queensland, Brisbane, Queensland 4072, Australia

<sup>10</sup> Centre for Cognitive Ageing and Cognitive Epidemiology, University of Edinburgh, Edinburgh, EH8 9JZ

<sup>11</sup> Aberdeen Biomedical Imaging Centre, Lilian Sutton Building, University of Aberdeen, Foresterhill, Aberdeen AB25 2ZD, UK

<sup>12</sup> MRC Human Genetics Unit, Institute of Genetics and Molecular Medicine, University of Edinburgh, Edinburgh, EH4 2XU

<sup>13</sup> Division of Psychiatry, University of Edinburgh, Royal Edinburgh Hospital, Edinburgh, EH10 5HF, UK

<sup>14</sup> Department of Psychology, University of Edinburgh, Edinburgh, EH8 9JZ

<sup>15</sup> Jointly supervised the study

1

## 2 **Abstract**

3

4 DNA methylation is associated with age. The deviation of age predicted from DNA  
5 methylation from actual age has been proposed as a biomarker for ageing. However, a  
6 better prediction of chronological age implies less opportunity for biological age. Here we  
7 used 13,661 samples in the age range of 2 to 104 years from 14 cohorts measured on  
8 Illumina HumanMethylation450/EPIC arrays to perform prediction analyses using Elastic Net  
9 and Best Linear Unbiased Prediction. We show that increasing the sample size achieves a  
10 smaller prediction error and higher correlations in test datasets. Our predictors achieved  
11 prediction errors of about 4.5 years across cohorts, in contrast to >7 years for the widely-  
12 used Horvath and Hannum predictors. We demonstrate that smaller prediction errors  
13 provide a limit to how much variation in biological ageing can be captured by methylation  
14 and provide evidence that age predictors from small samples are prone to confounding by  
15 cell composition.

16

17 **Key words:** DNA methylation, age prediction, best linear unbiased prediction, elastic net

18

## 19 **Introduction**

20 Ageing as a complex biological phenomenon is related to diseases and mortality <sup>1,2</sup>, and  
21 chronological age has been widely used as a marker of ageing due to ease and accuracy of  
22 measurement<sup>1</sup>. However, chronological age is not necessarily a good predictor of biological  
23 ageing since individuals with the same chronological age can vary in health, especially in  
24 later life <sup>3</sup>. Therefore, biomarkers of ageing have become popular as they can indicate the  
25 presence or severity of some disease states <sup>4,5</sup>. In 2013, Hannum *et al.* and Horvath built age  
26 predictors based on DNA methylation and implemented them as biomarkers of ageing <sup>6,7</sup>.  
27 DNA methylation as a part of the epigenome plays an essential role in the regulation of gene

1 expression in the human body<sup>8,9</sup>. Unlike DNA which is (mostly) stable across the lifetime of  
2 an individual, DNA methylation is dynamic, and previous studies have discovered a number  
3 of CpG sites associated with chronological age<sup>10-12</sup>. The age predictor developed by Hannum  
4 et al. was based on 482 blood samples with methylation measured on the Illumina 450K  
5 methylation arrays, and they reported a correlation of 0.91 and a Root Mean Square Error  
6 (RMSE) of 4.9 years in their test set<sup>6</sup>. Horvath's age predictor was based on 8,000 samples  
7 from different tissues and cell types, and probes of these samples were from the Illumina  
8 27K DNA methylation arrays. He reported a correlation of 0.96 and a Median Absolute  
9 Deviation (MAD) of 3.6 years in the test set. Age Acceleration Residuals, defined as the  
10 residuals from regressing predicted age on chronological age, have been reported to be  
11 associated with mortality, obesity and other complex traits<sup>13-16</sup>.

12

13 Although the reported prediction accuracy in both Hannum *et al.* and Horvath's age  
14 predictors were high, there are three possible ways to improve the prediction of  
15 chronological age: (1) increase the size of the training sample; (2) increase the coverage of  
16 DNA methylation in the genome, and (3) use better statistical methods. Hannum's age  
17 predictor was based upon 482 samples only, but with denser coverage (the Illumina 450K  
18 methylation chip) than the Horvath predictor, which was from a larger sample size, at the  
19 expense of a lower coverage (the Illumina 27K Methylation microarray). Both of these  
20 landmark studies used Elastic Net methodology to build the age predictor.

21

22 In the present study, we built DNA methylation-based age predictors by integrating 13,661  
23 samples (13,402 from blood and 259 from saliva) measured on 450K DNA methylation  
24 arrays and Illumina EPIC (850K) arrays. We estimated the effect of sample size and age

1 range on the prediction accuracy in test data sets. Two approaches were evaluated in the  
2 prediction accuracy of age: Elastic Net <sup>17</sup> and Best Linear Unbiased Prediction (BLUP) <sup>18</sup>. The  
3 performance of predictors on brain samples was also investigated. Finally, we discuss the  
4 implications of our results for the scope and utility of DNA methylation based age predictor  
5 as a biomarker for biological ageing.

6

## 7 **Results**

### 8 **Availability of DNA methylation in age prediction**

9 We downloaded eight datasets from the public domain and used six datasets from our own  
10 studies (**Table 1**). All data underwent identical quality control criteria before statistical  
11 analyses (**Material and Methods**).

12

### 13 **Estimation of variation in age from using all probes**

14 We used the two largest datasets (GS, N = 5,101, SGPD, N = 1,556) to estimate the  
15 proportion of the observed variation in age that is explained when fitting all probes  
16 simultaneously, using a mixed linear model analogous to estimating heritability from SNP  
17 data <sup>19</sup>. There were 2,586 and 1,299 unrelated individuals in GS and SGPD, respectively  
18 (**Material and Methods**). The proportion of variance of age explained by DNA methylation  
19 was close to 1 (proportion explained = 1, SE = 0.0036, REML analysis using the software  
20 package OSCA (<http://cnsgenomics.com/software/osca>)) in GS, and 0.99 in SGPD (SE =  
21 0.058), indicating a perfect age predictor can in principle be developed based on DNA  
22 methylation data if all probe associations are estimated without error. To demonstrate that  
23 this result is not caused by a violation of assumptions, we undertook a permutation test

1 using the same cohorts. We shuffled the ages across individuals and found that DNA  
2 methylation did not explain any significant amount of variation in GS (proportion explained  
3 = 0, SE = 0.0030) and SGPD (proportion explained = 0.0079, SE = 0.013).

4

### 5 **Effect of training sample size on age prediction**

6 To explore the factors contributing to prediction accuracy in the test cohorts, we performed  
7 a cross-validation analysis of the 14 cohorts using a common set of 319,607 probes that  
8 survived quality control (**Material and Methods**) in all cohorts. We randomly selected 1 to  
9 13 cohorts as a test set, and used the remaining cohorts as a training set. We repeated this  
10 step 65 times to generate different training sets with various sample size and age spectrum.

11 We implemented two estimates to evaluate the performance of our age predictors: (1)  
12 correlation between predicted age and chronological age in the test data set; (2) Root Mean  
13 Square Error (RMSE) of the predicted age in the test data set. Correlation indicates the  
14 strength of a linear relationship between the predicted age and chronological age and RMSE  
15 reveals the variation of the difference between predicted and chronological age. Two  
16 methods, namely Elastic Net<sup>17</sup> and BLUP<sup>18</sup> were compared. Elastic Net was previously used  
17 by Horvath<sup>7</sup> and Hannum et al.<sup>6</sup> to build their age predictors and BLUP was used to predict  
18 age in Peters et al.<sup>20</sup>. These methods differ in how they select probes that are associated  
19 with age and how their effects are estimated. Results show that both methods have a  
20 decrease of RMSE (**Figure 1**) and an increase of correlation (**Supplementary Figure 1**) when  
21 the training sample size increased. The smallest RMSE based on Elastic Net was 2.04 years.  
22 This method gave better results with RMSE relative to BLUP for small training sample size,  
23 although the difference with BLUP became smaller when the sample size increased  
24 (**Supplementary Figure 2**).

1  
2 To determine the factors that explain prediction accuracy, we examined the contribution of  
3 age ranges (including absolute age difference between training and test set ( $Age_{diff}$ ) and  
4 standard deviation of age ( $Age_{sd}$ ) of the training set) to the RMSE/correlation of the  
5 prediction results in the test set by estimating the effect of  $Age_{diff}$ ,  $Age_{sd}$  and sample size in  
6 the training set on the prediction accuracy jointly (**Material and Methods**). Results showed  
7 that RMSE was significantly associated ( $P < 0.05$ ) with training sample size in 13 (out of 14)  
8 cohorts based on BLUP predictors, confirming that increasing the sample size leads to  
9 smaller prediction errors. In addition, eight out of 14 cohorts had a significant ( $P < 0.05$ ) and  
10 positive  $Age_{diff}$  effect, indicating similar ages between training and test set can contribute to  
11 the better prediction accuracy. Five cohorts were found to have a statistically significant ( $P <$   
12  $0.05$ )  $Age_{sd}$  effect on RMSE, suggesting the prediction accuracy benefits from a larger age  
13 range of the samples in the training set. Similar results were found based on Elastic Net  
14 (**Supplementary Tables 1 and 2**).

15

#### 16 **Consistency of coefficients of probes between different methods**

17 To investigate the consistency of coefficients estimated in the two statistical methods, we  
18 performed a pairwise analysis where we estimated the correlation between the coefficient  
19 of all probes for two methods. We found that this correlation was significant ( $P < 2.2 \times 10^{-16}$ )  
20 regardless of the training sample size, and that the larger the training sample size, the  
21 higher the correlation ( $R$  increases from 0.44 to 0.67, **Supplementary Figure 3**). This  
22 suggests the performance of age predictors based on these two methods will become  
23 similar with the increase of training sample size. Furthermore, we identified that  
24 cg16867657 (*ELOVL2*) was the probe with the largest positive coefficient (0.52 years per

1 standard deviation of DNA methylation) and cg01620164 (*FIGN*) had the largest negative  
2 coefficient (-0.64 years per standard deviation of DNA methylation) for BLUP based age  
3 predictors. cg16867657 was also found to be the probe with the second largest coefficient  
4 in the Elastic Net based age predictor, but not for cg01620164 (**Supplementary Table 3**). All  
5 the above results were from the age predictor based on 13,566 training samples, the  
6 coefficient of each probe is listed in **Supplementary Table 4** and the corresponding  
7 Manhattan plot is presented in **Supplementary Figure 4**.

8

### 9 **Effect of probe sets on age prediction**

10 There is a complex correlation structure in DNA methylation, and the effective number of  
11 independent methylation probes was previously reported to be around 200<sup>21</sup>, indicating a  
12 dense correlation structure. To compare the prediction performance between using the full  
13 probe set (319,607 probes) and a pruned probe set (128,405 probes) (**Material and**  
14 **methods**), we applied the same cross-validation steps to both probe sets using BLUP and  
15 Elastic Net. We identified a higher RMSE and a lower correlation for the pruned set  
16 (**Supplementary Figure 5**), indicating a loss of information when using fewer methylation  
17 probes for prediction. This difference is more stable when the training sample size is large.  
18 Hence, despite the small effective number of independent probes, using all available  
19 information is better than pruned a set with a lower correlation structure.

20

21 We also compared the probes selected by Elastic Net (based on 13,566 training samples)  
22 with those in Horvath's and Hannum's age predictors. 11 out of the 514 probes in our  
23 analysis were identified in Horvath's age predictor and 30 in Hannum's age predictor. In  
24 addition, we estimated the squared correlation ( $R^2$ ) of DNA methylation between probes

1 selected by Elastic Net and probes from the age predictor of Hannum/Horvath. We found 11  
2 (Elastic Net-Hannum) and 10 (Elastic Net-Horvath) pairs with an  $R^2$  larger than 0.5  
3 (**Supplementary Figure 6**), indicating that most of the probes selected by Elastic Net are not  
4 strongly correlated with those in the other two predictors. To quantify whether the probes  
5 in the Hannum and Horvath predictors were necessary for age prediction, we re-built our  
6 age predictors by excluding these probes. No difference in prediction accuracy was found  
7 before and after removing these probes for the BLUP based method (**Figure 2**). The  
8 prediction accuracy decreased for the Elastic Net based method; however, its performance  
9 was still better than when using the Hannum and Horvath age predictors (**Supplementary**  
10 **Figure 7**). This suggests that the probes used for age prediction are not limiting, and BLUP  
11 has a better tolerance than Elastic Net in age prediction when some age-associated probes  
12 are missing.

13

14

### 15 **Tissue specificity in age prediction**

16 The majority of our samples are from blood, and we observed a significant improvement in  
17 the prediction results for the samples from saliva when more blood samples were included  
18 in the training set (**Figure 1, Supplementary Figure 1**). The same trend was observed for the  
19 correlation results in brain tissue samples of the GSE59685 (GEO accession ID) cohort  
20 (**Materials and Methods**) using BLUP estimators derived from blood and saliva samples  
21 (**Figure 3A**), but not for RMSE (**Figure 3B**). RMSE was not improved by increasing the training  
22 sample size. It was highly variable for small training samples and then became steady when  
23 the training sample size was over 5,000. The large and variable RMSE in the brain samples is



1 not caused by batch effects since we can observe a small RMSE for the blood samples in the  
2 same cohort.

3

4 To quantify whether the large RMSE is consistent in the brain samples from other cohorts,  
5 we downloaded two additional data sets (GSE61431 and GSE80970) that contain brain  
6 samples and compared predicted ages with chronological age in these cohorts. The age  
7 predictor based on 13,566 training samples using the BLUP method was applied. We  
8 observed a high RMSE and correlation in all cohorts (**Table 2**), indicating the large RMSE is  
9 caused by the bias of the age predictors due to tissue-specific DNA methylation. Compared  
10 to the results based on the age predictor of Horvath (training samples are from multiple  
11 tissues), higher RMSE and comparable correlations were observed in our analysis,  
12 suggesting our age predictor could have a similar performance with the age predictor of  
13 Horvath in samples from brain tissues when only correlations are considered. The predicted  
14 age and chronological age in the same brain regions from three separate cohorts was found  
15 to have similar regression slopes (**Supplementary Figure 8**). We also found this similarity  
16 between samples from frontal cortex and superior temporal gyrus, indicating the  
17 relationship between DNA methylation and chronological age is close between these two  
18 brain regions. Similar results were found from the Elastic Net based age predictor  
19 (**Supplementary Table 5, Supplementary Figure 9**).

20

## 21 **Transformed DNA methylation in age prediction**

22 We found a significant correlation between prediction residuals (predicted age -  
23 chronological age) and predicted age from BLUP ( $R = -0.18$ ,  $P < 2.2 \times 10^{-16}$ , 95% CI [-0.19, -  
24 0.16], **Supplementary Figure 10**) and Elastic Net ( $R = -0.11$ ,  $P < 2.2 \times 10^{-16}$ , 95% CI [-0.12, -

1 0.089]) -based age predictors respectively (13,566 training samples). Two sources of bias  
2 could explain this significant correlation: (1) violation of the assumption of linearity; (2) bias  
3 induced by the regularization step in the prediction methods. To investigate the possible  
4 effect of nonlinearity, we applied several data transformation methods to the raw DNA  
5 methylation beta value before training and used the transformed data in age prediction  
6 within each cohort (**Materials and Methods**). We found that RMSE was reduced by 7.6% in  
7 LBC1921 and 6.3% in LBC1936 compared to the result based on raw data (**Supplementary**  
8 **Figure 11**); however, the decrease was substantially lower in other cohorts (around 2%).  
9 Additionally, the smallest RMSE was obtained with variable power transformation in each  
10 cohort (from 0.2 to 0.7), so that there is not a single power transformation to improve age  
11 prediction in all cohorts. Furthermore, we did not observe any improvement using the M  
12 values of DNA methylation or using the arcsine square root transformation (**Supplementary**  
13 **Figure 12**).

14

#### 15 **Prediction accuracy and biological ageing**

16 The difference ( $\Delta_{age}$ ) between predicted age from the Hannum/Horvath predictors and  
17 chronological age was found to be associated with all-cause mortality in later life<sup>13</sup>. To  
18 investigate the relationship between the significance of this association and the prediction  
19 accuracy of the predictor, we examined the association between  $\Delta_{age}$  and mortality using  
20 the updated data in Marioni et al.<sup>13</sup>. These data were from two cohorts: LBC1921 (wave  
21 one, N = 436, N<sub>deaths</sub> = 386) and LBC1936 (wave one, N = 906, N<sub>deaths</sub> = 214) (**Materials and**  
22 **Methods**). We used age predictors excluding LBC1921/LBC1936 as part of the training set  
23 (sample size ranges from 335 to 12,710). We observed a decrease of the test statistics from  
24 the survival analysis (t-test) with increasing sample size in training data set (**Figure 4**). No

1 significant associations between  $\Delta_{age}$  and mortality was found based on the largest training  
2 sample size in either LBC1921 or LBC1936 using BLUP or Elastic Net (**Table 3 and**  
3 **Supplementary Table 6**). Furthermore, we applied this survival analysis based on  $\Delta_{age}$   
4 adjusting for white blood cell (WBC) counts (basophils, eosinophils, monocytes,  
5 lymphocytes, and neutrophils) since WBC counts were found to be associated with DNA  
6 methylation<sup>22</sup> and mortality<sup>23</sup> (**Materials and Methods**). A large and positive change of the  
7 test statistics after correcting for the WBC counts was observed, especially when the  
8 training sample size is small (**Supplementary Figure 13**). These results suggest that the  
9 significant associations between  $\Delta_{age}$  and mortality could be biased due to the existence of  
10 confounders like WBC counts, and that improving the prediction accuracy of the age  
11 predictor could reduce the effect of these confounders in the survival analysis.

12

## 13 **Discussion**

14 We investigated the factors that can affect the accuracy of chronological age prediction by  
15 combining around 14,000 samples from 14 cohorts, including the effect of the training  
16 sample size, the age range of the training samples, the number of probes used and the  
17 statistical methods utilised. We found a positive association between the training sample  
18 size and the prediction accuracy in test sets. Prediction performance using estimated  
19 coefficients from either Elastic Net or BLUP were similar when the training sample size was  
20 over 8,000. Our predictors showed substantially improved prediction accuracy compared to  
21 using the estimated coefficients previously reported by Hannum<sup>6</sup> and Horvath<sup>7</sup>. Most of  
22 this improvement appears to come from simply increasing the experimental sample size in  
23 the training set. We also found that increased similarity of ages between samples in the  
24 training and test data set can improve the prediction accuracy in the test sets

1 **(Supplementary Tables 1 and 2)**. In addition, the slopes from regressing chronological age  
2 on predicted age based on our predictors were closer to 1 than the other two public age  
3 predictors in most cohorts (11 out of 14), indicating that our predictors are more unbiased  
4 **(Supplementary Figure 14)**. We provide estimated effect sizes on chronological age from  
5 the largest training set of 13,566 individuals for both Elastic Net and BLUP in **Supplementary**  
6 **Table 4**.

7  
8 Predicted ages in samples from brain tissues showed high RMSE but strong correlation  
9 **(Table 2)**. The matched predicted age between three different cohorts in the same brain  
10 tissue implies this large RMSE can be induced by the bias of our model since there are only  
11 samples from blood and saliva in the training dataset and DNA methylation is tissue specific  
12 <sup>24</sup>. Despite this, the high correlation in the prediction results reflects that the changing rate  
13 of DNA methylation is correlated across tissues, as reported previously<sup>7</sup>. In addition,  
14 although RMSE is much larger, the correlation in our analysis is close to that from Horvath's  
15 age predictor, which suggests that our predictor can be used in brain tissues when only  
16 relative age is needed. Moreover, we found similar slopes for the regression of predicted  
17 age on chronological age for samples from the prefrontal cortex and superior temporal  
18 gyrus, indicating a similar association between DNA methylation and age across these two  
19 brain regions.

20  
21 Notwithstanding the highly correlated pattern of DNA methylation across the genome, we  
22 observed a decline of prediction accuracy when using the pruned probe set, so that  
23 including more probes in the training model is beneficial, especially when the training  
24 sample size is small **(Supplementary Figure 7)**. The improvement of prediction accuracy

1 could be explained by the decrease of noise effect (such as batch effects) of DNA  
2 methylation in age prediction since using more probes can reduce the unexpected effects of  
3 the noise. It could also be caused by the existence of many probes with a small correlation  
4 with age and the cumulative effect of these may be lost when using a pruned set of probes.

5  
6 We defined the prediction residual as the difference between the predicted age and the  
7 chronological age in the test set. Residuals from the prediction model in the test set can be  
8 decomposed into errors caused by bias and stochastic variation <sup>25</sup>. We identified a  
9 significant correlation between prediction residuals and predicted age, and attributed this  
10 correlation to the bias of the prediction model. We observed a considerable difference of  
11 RMSE between the training (RMSE  $\approx$  0) and test set for the BLUP based method, which  
12 means BLUP is more prone to “overfitting” than Elastic Net, as expected from the  
13 assumption that all probes have an effect (**Supplementary Figure 15**). Although the  
14 prediction error was smaller using Elastic Net, the bias in Elastic Net was higher, and the  
15 performance between BLUP and Elastic Net became similar when the training sample size  
16 was larger than 8,000.

17  
18 Our results have several implications for the utility of DNA methylation patterns of age as  
19 biomarkers of ageing. From the REML analysis on the SGPD and GS cohorts we estimated  
20 that almost 100% of variation in chronological age in those samples could be effectively  
21 captured by all the DNA methylation probes on the arrays. For prediction, this implies that  
22 for a very large training set a near-perfect predictor of chronological age can be built. Our  
23 results showing that larger sample sizes lead to more accurate prediction is consistent with  
24 this implication. Therefore, the higher the prediction accuracy and smaller the prediction

1 error (the difference between predictor and actual value), the less opportunity there is for  
2 DNA methylation to capture biological ageing. It is clear that DNA methylation measured in  
3 blood is associated with environmental exposures such as smoking, sex and BMI <sup>26-28</sup>. In  
4 addition, “age acceleration”, the difference between actual age and that predicted from  
5 methylation, has been reported to be associated with a number of outcomes, including  
6 mortality <sup>13,16</sup>. However, there is currently no good DNA-methylation-based estimator of an  
7 individual’s “epigenetic clock” that is free from confounders (e.g., white blood cell counts)  
8 and from prediction error caused by other factors (e.g., measurement error). The difference  
9 between actual and predicted age contains both a prediction error term based on unknown  
10 factors and possible effects of confounders.

11

12

## 13 **Methods**

### 14 **Data**

15 We collected 14 data cohorts with samples measured on the DNA methylation 450K chips  
16 and Illumina EPIC (850K) arrays (**Table 1**), eight of which were from the public domain and  
17 six datasets from the investigators. Details of the BSGS and LBC cohorts can be found in  
18 Powell et al. <sup>29</sup> and Deary et al. <sup>30,31</sup>. GS is a population and family based cohort recruited  
19 through the NHS Scotland general practitioner research network <sup>32,33</sup>. The SGPD cohort is  
20 from a collaborative research project on systems genomics of Parkinson’s Disease. Similarly,  
21 the MND cohort is from a systems genomics study of Motor Neuron Disease in Chinese  
22 subjects (see descriptions in Benyamin et al. <sup>34</sup>). For the purpose of this study, age at sample  
23 collection was the focus, disease status and ethnicity of individuals were not considered in  
24 any cohort. DNA methylation Beta value at each probe was used for analysis.

1

2 A total of 319,607 probes (No Pruned Set) passed our quality control and 128,405 probes  
3 (Pruned Set) were retained after pruning based upon the pairwise correlation of probes (see  
4 next section). We also downloaded three cohorts from GEO database with accession ID  
5 GSE61431<sup>35</sup>, GSE59685<sup>36</sup> and GSE80970 to test the performance of age predictors in brain  
6 tissues. GSE59685 contains 80 samples from whole blood and 451 samples from brain  
7 samples. These brain samples are from four types of brain regions including 112 samples  
8 from the cerebellum, 108 samples from the entorhinal cortex, 114 samples from prefrontal  
9 cortex and 117 samples from superior temporal gyrus. GSE61431 contains 44 samples from  
10 the cerebellum and 43 samples from the prefrontal cortex. There are 142 samples from the  
11 prefrontal cortex and 144 samples from the superior temporal gyrus in GSE80970.

12

### 13 **Quality Control**

14 All the samples were measured on either the Illumina HumanMethylation450 arrays or  
15 Illumina EPIC arrays. Probes with call rate less than 0.95 were removed, and probes found to  
16 contain SNPs or potentially cross-hybridizing to different locations were excluded from  
17 further analysis<sup>37</sup>. After combining all the samples from different cohorts, a set of 319,607  
18 probes remained (called No Pruned set). Pruning was performed by removing one of two  
19 probes on the same chromosome when their correlation ( $R^2$ ) was higher than 0.2; this  
20 resulted in a set of 128,405 probes (called Pruned set). Both sets were used for further  
21 analysis. DNA methylation Beta value was standardized by removing the mean value and  
22 divided by the standard deviation for each sample.

23

## 1 **Selection of DNA methylation cohorts**

2 We collected 14 different cohorts in total, including a single cohort (GSE78874) measured in  
3 saliva rather than blood tissue. Since DNA methylation is sensitive to batch effects, cell type  
4 and tissue type<sup>22</sup>, we applied a PCA analysis (using probes from the No Pruned Set) on the  
5 samples from these 14 cohorts to assess the presence of any “outlier” cohorts (i.e. cohorts  
6 with a low prediction accuracy from the age predictor based on the other cohorts). All the  
7 cohorts were closely matched with the exception of GSE78874 and GS (**Supplementary**  
8 **Figure 16**). Samples in GSE78874 were from saliva instead of blood, and the samples in GS  
9 were measured using Illumina EPIC arrays instead of 450K DNA methylation arrays. To  
10 investigate if this difference could potentially adversely influence performance in age  
11 prediction for these two cohorts, we used a “leave-one-cohort-out” strategy to leave these  
12 two cohorts out as the test set separately and built the age predictor based on the  
13 remaining cohorts. We found both of them to have good prediction accuracy (GS:  $R = 0.98$ ,  
14  $RMSE = 3.52$ , GSE78874:  $R = 0.88$ ,  $RMSE = 5.39$ ), indicating a small difference between these  
15 two cohorts and other cohorts in age prediction. We used all cohorts for subsequent  
16 analyses.

17

## 18 **Proportion of variance of chronological age explained by DNA methylation**

19 The GS and SGPD samples were used in estimating the proportion of variance of  
20 chronological age explained by DNA methylation. Among the 5,101 samples in the GS cohort,  
21 a subset of 2,586 unrelated individuals, with a genetic relationship coefficient below 0.05  
22 and with no shared nuclear family environment were considered for the analysis. 1,299  
23 unrelated (genetic relationship coefficient  $< 0.05$ ) individuals with available age information



1 in SGPD were selected. Variance of age was estimated by the REML method implemented in  
2 OSCA (<http://cnsngenomics.com/software/osca>).

3

#### 4 **Prediction algorithm**

5 We compared the age prediction performance of two methods, namely Elastic Net and  
6 BLUP. Both methods are based on a linear regression:

$$Y = \sum \beta_i X_i + e$$

7 where  $Y$  is the chronological age,  $X_i$  is the DNA methylation of probe  $i$  and  $e$  is the Gaussian  
8 noise.

9 Elastic Net is a regularized regression method<sup>17</sup>, and its objective function is defined as:

$$10 \quad L(\alpha, \beta) = \|Y - X\beta\|^2 + \lambda \left( \frac{1-\alpha}{2} \|\beta\|_2^2 + \alpha \|\beta\|_1 \right)$$

11 where  $\alpha$  and lambda are regularisation parameters.  $\|\beta\|_1$  is defined as  $\sum_{i=1}^n |\beta_i|$  and  $\|\beta\|_2^2$   
12 equals  $\sum_{i=1}^n \beta_i^2$ , with  $n$  the number of probes.  $\alpha$  is set to 0.5 and  $\lambda$  is chosen based on cross-  
13 validation. We used the implementation of Elastic Net from the Python package `glmnet`<sup>38</sup>.

14

15 BLUP is special case of ridge regression with a fixed  $\lambda$ .

$$16 \quad \hat{\beta} = (X'X + \lambda I)^{-1} X'Y \text{ with } \lambda = \frac{\sigma_e^2}{\sigma_u^2},$$

17  $\sigma_u^2$  the variance of the effect size of the probe set, and  $\sigma_e^2$  the variance of the residuals. We  
18 used the R package `rrBLUP`<sup>39</sup> to build the age predictor, and  $\sigma_u^2$  and  $\sigma_e^2$  were estimated using  
19 the REML analysis implemented in this package.

20

#### 21 **Transformation of DNA methylation**

1 We selected eight DNA methylation cohorts with sample size larger than 600 to evaluate the  
2 impact of data transformation: LBC1921, LBC1936, GS, BSGS, SGPD, MND, GSE40279 and  
3 GSE42861. For each cohort, we randomly selected 70% of the samples as training set, and  
4 the remaining 30% were used as test set. Only 50,000 randomly selected probes were used  
5 for computational efficiency. Power (from 0.1 to 2) transformation was applied to the  
6 original Beta value of DNA methylation, and only BLUP was used for age prediction because  
7 of its low bias. DNA methylation M value and arcsine square root transformed methylation  
8 Beta value were also used to compare to raw DNA methylation Beta value in prediction  
9 accuracy.

10

## 11 **Survival analysis**

12 We followed the same analysis approach as previously described<sup>13</sup>. Briefly, Cox proportional  
13 hazards regression models were used to detect the association between the  $\Delta_{age}$  and  
14 mortality with age at sample collection and sex as the covariates.  $\Delta_{age}$  is defined as the  
15 difference between  $m_{age}$  and chronological age, where  $m_{age}$  is the predicted age correcting  
16 for plate, array, position on the array, and hybridisation date (all treated as fixed effect  
17 factors), all of which could be confounder in survival analysis. Additional adjustments of  
18  $\Delta_{age}$  were made for WBC counts measured on the same blood samples that were analysed  
19 for methylation. Hazard ratios for  $\Delta_{age}$  were expressed per five years of methylation age  
20 acceleration (**Table 3**) and per standard deviation of methylation age acceleration  
21 (**Supplementary Table 5**), respectively. Cox models were performed utilizing the ‘survival’  
22 library<sup>40</sup> in R. Samples from wave one of LBC1921 and LBC1936 were used in this analysis.

23

## 1 **Acknowledgements**

2 This research was supported by the Australian Research Council (DP160102400), the  
3 Australian National Health and Medical Research Council (1078037, 1078901, 1103418,  
4 1107258, 1127440 and 1113400), and the Sylvia & Charles Viertel Charitable Foundation.  
5 Riccardo Marioni was supported by Alzheimer’s Research UK Major Project Grant [ARUK-  
6 PG2017B-10]. Generation Scotland received core support from the Chief Scientist Office of  
7 the Scottish Government Health Directorates [CZD/16/6] and the Scottish Funding Council  
8 [HR03006]. Genotyping and DNA methylation profiling of the GS:SFHS samples was carried  
9 out by the Genetics Core Laboratory at the Wellcome Trust Clinical Research Facility,  
10 Edinburgh, Scotland and was funded by the Medical Research Council UK and the Wellcome  
11 Trust (Wellcome Trust Strategic Award “STratifying Resilience and Depression Longitudinally”  
12 ((STRADL) Reference 104036/Z/14/Z).  
13

## 14 **Author contributions**

15 A.F.M and P.M.V conceived and designed the experiments. Q.Z performed all statistical  
16 analyses. Q.Z, A.F.M and P.M.V wrote the paper. R.E.M, I.J.D, J.Y and N.W.R advised on  
17 statistical methodology, C.L.V, R.M.W, T.L, A.K.H, G.W. M, J.H, D.F, J.F, M.K, T.P, J.P, G.H, J.B.  
18 K, I.H, S.L, T.A, P.A.S, G.D.M, S.E.H, P.R, A.D.M, D.J.P, C.S.H, K.L.E, A.M.M, J.G contributed  
19 data. All authors read and approved the final manuscript.

20

## 21 **Competing interests**

22 The authors declare no competing financial interests.

## 1 Reference

- 2
- 3 1 Fries, J. F. Aging, natural death, and the compression of morbidity. *B World Health Organ* **80**, 245-250 (2002).
- 4
- 5 2 Gavrilov, L. A. & Gavrilova, N. S. The reliability theory of aging and longevity. *J Theor Biol* **213**, 527-545, doi:10.1006/jtbi.2001.2430 (2001).
- 6
- 7 3 Baker, G. T. & Sprott, R. L. Biomarkers of aging. *Experimental gerontology* **23**, 223-239 (1988).
- 8
- 9 4 McClearn, G. E. Biomarkers of age and aging. *Experimental gerontology* **32**, 87-94 (1997).
- 10
- 11 5 Johnson, T. E. Recent results: Biomarkers of aging. *Experimental Gerontology* **41**, 1243-1246, doi:10.1016/j.exger.2006.09.006 (2006).
- 12
- 13 6 Hannum, G. *et al.* Genome-wide methylation profiles reveal quantitative views of human aging rates. *Molecular cell* **49**, 359-367 (2013).
- 14
- 15 7 Horvath, S. DNA methylation age of human tissues and cell types. *Genome biology* **14**, 3156 (2013).
- 16
- 17 8 Razin, A. & Riggs, A. D. DNA methylation and gene function. *Science* **210**, 604-610 (1980).
- 18
- 19 9 Bird, A. P. CpG-rich islands and the function of DNA methylation. *Nature* **321**, 209-213 (1986).
- 20
- 21 10 Hernandez, D. G. *et al.* Distinct DNA methylation changes highly correlated with chronological age in the human brain. *Human molecular genetics* **20**, 1164-1172 (2011).
- 22
- 23
- 24 11 Florath, I., Butterbach, K., Müller, H., Bewerunge-Hudler, M. & Brenner, H. Cross-sectional and longitudinal changes in DNA methylation with age: an epigenome-wide analysis revealing over 60 novel age-associated CpG sites. *Human molecular genetics* **23**, 1186-1201 (2013).
- 25
- 26
- 27
- 28 12 Bell, J. T. *et al.* Epigenome-wide scans identify differentially methylated regions for age and age-related phenotypes in a healthy ageing population. *PLoS genetics* **8**, e1002629 (2012).
- 29
- 30
- 31 13 Marioni, R. E. *et al.* DNA methylation age of blood predicts all-cause mortality in later life. *Genome biology* **16**, 25 (2015).
- 32
- 33 14 Horvath, S. *et al.* Obesity accelerates epigenetic aging of human liver. *P Natl Acad Sci USA* **111**, 15538-15543, doi:10.1073/pnas.1412759111 (2014).
- 34
- 35 15 Wolf, E. J. *et al.* Accelerated DNA methylation age: Associations with PTSD and neural integrity. *Psychoneuroendocrino* **63**, 155-162, doi:10.1016/j.psyneuen.2015.09.020 (2016).
- 36
- 37
- 38 16 Chen, B. H. *et al.* DNA methylation-based measures of biological age: meta-analysis predicting time to death. *Aging (Albany NY)* **8**, 1844-1865, doi:10.18632/aging.101020 (2016).
- 39
- 40
- 41 17 Zou, H. & Hastie, T. Regularization and variable selection via the elastic net. *Journal of the Royal Statistical Society: Series B (Statistical Methodology)* **67**, 301-320 (2005).
- 42
- 43 18 Robinson, G. K. That BLUP is a good thing: the estimation of random effects. *Statistical science*, 15-32 (1991).
- 44
- 45 19 Yang, J. *et al.* Common SNPs explain a large proportion of the heritability for human height. *Nat Genet* **42**, 565-569, doi:10.1038/ng.608 (2010).
- 46

- 1 20 Peters, M. J. *et al.* The transcriptional landscape of age in human peripheral blood.  
2 *Nature communications* **6** (2015).
- 3 21 Shah, S. *et al.* Improving phenotypic prediction by combining genetic and epigenetic  
4 associations. *The American Journal of Human Genetics* **97**, 75-85 (2015).
- 5 22 Houseman, E. A. *et al.* DNA methylation arrays as surrogate measures of cell mixture  
6 distribution. *Bmc Bioinformatics* **13**, doi:Artn 8610.1186/1471-2105-13-86 (2012).
- 7 23 Ruggiero, C. *et al.* White blood cell count and mortality in the Baltimore Longitudinal  
8 Study of Aging. *J Am Coll Cardiol* **49**, 1841-1850, doi:10.1016/j.jacc.2007.01.076  
9 (2007).
- 10 24 Davies, M. N. *et al.* Functional annotation of the human brain methylome identifies  
11 tissue-specific epigenetic variation across brain and blood. *Genome Biology* **13**,  
12 doi:ARTN R4310.1186/gb-2012-13-6-r43 (2012).
- 13 25 Geman, S., Bienenstock, E. & Doursat, R. Neural Networks and the Bias Variance  
14 Dilemma. *Neural Comput* **4**, 1-58, doi:DOI 10.1162/neco.1992.4.1.1 (1992).
- 15 26 Joehanes, R. *et al.* Epigenetic signatures of cigarette smoking. *Circulation:  
16 Cardiovascular Genetics* **9**, 436-447 (2016).
- 17 27 Mendelson, M. M. *et al.* Association of body mass index with DNA methylation and  
18 gene expression in blood cells and relations to cardiometabolic disease: a mendelian  
19 randomization approach. *PLoS medicine* **14**, e1002215 (2017).
- 20 28 Yousefi, P. *et al.* Sex differences in DNA methylation assessed by 450 K BeadChip in  
21 newborns. *BMC Genomics* **16**, 911, doi:10.1186/s12864-015-2034-y (2015).
- 22 29 Powell, J. E. *et al.* The Brisbane Systems Genetics Study: genetical genomics meets  
23 complex trait genetics. *PLoS One* **7**, e35430, doi:10.1371/journal.pone.0035430  
24 (2012).
- 25 30 Deary, I. J., Gow, A. J., Pattie, A. & Starr, J. M. Cohort profile: the Lothian Birth  
26 Cohorts of 1921 and 1936. *International journal of epidemiology* **41**, 1576-1584  
27 (2011).
- 28 31 Taylor, A. M., Pattie, A. & Deary, I. J. Cohort Profile Update: The Lothian Birth  
29 Cohorts of 1921 and 1936. *Int J Epidemiol*, doi:10.1093/ije/dyy022 (2018).
- 30 32 Smith, B. H. *et al.* Cohort Profile: Generation Scotland: Scottish Family Health Study  
31 (GS:SFHS). The study, its participants and their potential for genetic research on  
32 health and illness. *Int J Epidemiol* **42**, 689-700, doi:10.1093/ije/dys084 (2013).
- 33 33 Navrady, L. B. *et al.* Cohort Profile: Stratifying Resilience and Depression  
34 Longitudinally (STRADL): a questionnaire follow-up of Generation Scotland: Scottish  
35 Family Health Study (GS:SFHS). *Int J Epidemiol* **47**, 13-14g, doi:10.1093/ije/dyx115  
36 (2018).
- 37 34 Benyamin, B. *et al.* Cross-ethnic meta-analysis identifies association of the GPX3-  
38 TNIP1 locus with amyotrophic lateral sclerosis. *Nat Commun* **8**, 611,  
39 doi:10.1038/s41467-017-00471-1 (2017).
- 40 35 Pidsley, R. *et al.* Methylomic profiling of human brain tissue supports a  
41 neurodevelopmental origin for schizophrenia. *Genome Biol* **15**, 483,  
42 doi:10.1186/s13059-014-0483-2 (2014).
- 43 36 Lunnon, K. *et al.* Methylomic profiling implicates cortical deregulation of ANK1 in  
44 Alzheimer's disease. *Nat Neurosci* **17**, 1164-1170, doi:10.1038/nn.3782 (2014).
- 45 37 Price, E. M. *et al.* Additional annotation enhances potential for biologically-relevant  
46 analysis of the Illumina Infinium HumanMethylation450 BeadChip array. *Epigenet  
47 Chromatin* **6**, doi:1756-8935-6-4 (2013).

- 1 38 Friedman, J., Hastie, T. & Tibshirani, R. Regularization Paths for Generalized Linear  
2 Models via Coordinate Descent. *J Stat Softw* **33**, 1-22 (2010).
- 3 39 Endelman, J. B. Ridge regression and other kernels for genomic selection with R  
4 package rrBLUP. *The Plant Genome* **4**, 250-255 (2011).
- 5 40 A Package for Survival Analysis in S v. 2.38 (2015).
- 6 41 Horvath, S. *et al.* An epigenetic clock analysis of race/ethnicity, sex, and coronary  
7 heart disease. *Genome Biology* **17**, doi:10.1186/s13059-016-1030-0 (2016).
- 8 42 Horvath, S. *et al.* Aging effects on DNA methylation modules in human brain and  
9 blood tissue. *Genome Biol* **13**, R97, doi:10.1186/gb-2012-13-10-r97 (2012).
- 10 43 Liu, Y. *et al.* Epigenome-wide association data implicate DNA methylation as an  
11 intermediary of genetic risk in rheumatoid arthritis. *Nat Biotechnol* **31**, 142-147,  
12 doi:10.1038/nbt.2487 (2013).
- 13 44 Li, Y. *et al.* An Epigenetic Signature in Peripheral Blood Associated with the  
14 Haplotype on 17q21.31, a Risk Factor for Neurodegenerative Tauopathy. *Plos Genet*  
15 **10**, doi: 10.1371/journal.pgen.1004211 (2014).
- 16
- 17

1 Table 1: Description of DNA methylation cohorts

| COHORT <sup>1</sup>      | SAMPLE SIZE <sup>2</sup> | NUMBER OF SAMPLES WITH VALID AGE | MEAN AGE(SD) | AGE RANGE    | SOURCE | DISEASE                                                                                                                                                      |
|--------------------------|--------------------------|----------------------------------|--------------|--------------|--------|--------------------------------------------------------------------------------------------------------------------------------------------------------------|
| LBC1921 <sup>30,31</sup> | 692                      | 692                              | 82.3 (4.3)   | [77.8, 90.6] | blood  | Not Available                                                                                                                                                |
| LBC1936 <sup>30,31</sup> | 2326                     | 2326                             | 72.4 (2.8)   | [67.7, 77.7] | blood  | Not Available                                                                                                                                                |
| BSGS <sup>29</sup>       | 614                      | 614                              | 21.4 (14.1)  | [9.9, 74.9]  | blood  | Not Available                                                                                                                                                |
| SGPD                     | 1962                     | 1556                             | 67.2 (9.5)   | [23.0,104.0] | blood  | Parkinson's Disease: 988, Control: 974                                                                                                                       |
| MND <sup>34</sup>        | 695                      | 600                              | 45.2 (15.0)  | [17.0,76.0]  | blood  | Motor Neuron Disease (MND): 497, Control: 198                                                                                                                |
| GS <sup>32,33</sup>      | 5101                     | 5100                             | 48.5(14.0)   | [18.0,94.5]  | blood  | Not Available                                                                                                                                                |
| GSE72775 <sup>41</sup>   | 335                      | 335                              | 70.2 (10.3)  | [36.5,90.5]  | blood  | Not Available                                                                                                                                                |
| GSE78874 <sup>41</sup>   | 259                      | 259                              | 68.8(9.7)    | [36.0,88.0]  | saliva | Not Available                                                                                                                                                |
| GSE72773 <sup>41</sup>   | 310                      | 310                              | 65.6 (13.9)  | [35.1,91.9]  | blood  | Not Available                                                                                                                                                |
| GSE72777 <sup>41</sup>   | 46                       | 46                               | 14.7 (10.4)  | [2.2,35.0]   | blood  | Not Available                                                                                                                                                |
| GSE41169 <sup>42</sup>   | 95                       | 95                               | 31.6 (10.3)  | [18.0,65.0]  | blood  | Schizophrenia:62, Control:33                                                                                                                                 |
| GSE40279 <sup>6</sup>    | 656                      | 656                              | 64.0 (14.7)  | [19.0,101.0] | blood  | Not Available                                                                                                                                                |
| GSE42861 <sup>43</sup>   | 689                      | 689                              | 51.9 (11.8)  | [18.0,70.0]  | blood  | Rheumatoid Arthritis:354, Control:335                                                                                                                        |
| GSE53740 <sup>44</sup>   | 384                      | 383                              | 67.8(9.6)    | [34.0,93.0]  | blood  | Alzheimer's Disease:15, Corticobasal Degeneration:1, Frontotemporal Dementia (FTD):121, FTD/MND:7, Progressive Supranuclear Palsy:43, Control:193, Unknown:4 |

2

3

4

5

6

7

<sup>1</sup> LBC = Lothian Birth Cohort; BSGS = Brisbane Systems Genomics Study; SGPD = Systems Genomic of Parkinson's Disease consortium; MND = Motor Neuron Disease cohort; GS = Generation Scotland. Cohorts with prefix GSE are from the GEO database.

<sup>2</sup> The number of samples in each cohort. Some samples in LBC were measured from the same individual but at different chronological age.

1 Table 2: Prediction results on the samples from four different brain regions in three  
2 different cohorts. Age predictor is trained based on 13,566 samples and using the BLUP  
3 method.

| Brain Region               | GSE59685          |                     |                                | GSE61431        |             |                   | GSE80970 |             |                   |
|----------------------------|-------------------|---------------------|--------------------------------|-----------------|-------------|-------------------|----------|-------------|-------------------|
|                            | RMSE <sup>1</sup> | R (SE) <sup>2</sup> | Horvath<br>RMSE/R <sup>3</sup> | RMSE            | R (SE)      | Horvath<br>RMSE/R | RMSE     | R (SE)      | Horvath<br>RMSE/R |
| entorhinal<br>cortex       | 28.0              | 0.62 (0.08)         | 8.4/0.66                       | NA <sup>4</sup> | NA          | NA                | NA       | NA          | NA                |
| prefrontal<br>cortex       | 31.2              | 0.74 (0.06)         | 10.4/0.74                      | 23.7            | 0.91 (0.07) | 13.0/0.91         | 35.0     | 0.60 (0.07) | 16.3/0.63         |
| superior<br>temporal gyrus | 31.6              | 0.76 (0.06)         | 9.3/0.81                       | NA              | NA          | NA                | 35.2     | 0.68 (0.06) | 17.2/0.60         |
| cerebellum                 | 33.7              | 0.62 (0.07)         | 24.0/0.77                      | 22.1            | 0.78 (0.1)  | 19.4/0.78         | NA       | NA          | NA                |

4

5 <sup>1</sup>Root Mean Square Error of the predicted age in the test set.

5

6 <sup>2</sup>Correlation between predicted age and chronological age in the test set.

6

7 <sup>3</sup>Root Mean Square Error of the predicted age and the correlation between predicted age and chronological age based on  
8 Horvath's Age predictor in the test set.

7

8

9 <sup>4</sup>NA means there is no DNA methylation in this cohort for the brain region.

9

10



1 Table 3: Summary details of two LBC cohorts and the relationship between all-cause  
2 mortality and predicted age from different methods

|                                                     | <b>LBC1921 wave one</b> | <b>LBC1936 wave one</b>  |
|-----------------------------------------------------|-------------------------|--------------------------|
| N                                                   | 436                     | 906                      |
| N <sub>deaths</sub>                                 | 386                     | 214                      |
| Chronological Age: mean (SD) <sup>1</sup>           | 79.1 (0.6)              | 69.5 (0.8)               |
| Hannum: mean (SD)                                   | 80.3 (6.2)              | 71.3 (5.7)               |
| Hannum: Hazard Ratio (P-value, 95% CI) <sup>2</sup> | 1.12 (0.016, 1.02-1.23) | 1.18 (0.020, 1.02-1.37)  |
| Horvath: mean (SD)                                  | 73.8 (6.9)              | 66.1 (6.4)               |
| Horvath: Hazard Ratio (P-value, 95% CI)             | 1.09 (0.038, 1.00-1.20) | 1.19 (0.0022, 1.06-1.32) |
| Elastic Net: mean (SD) <sup>3</sup>                 | 77.4 (3.6)              | 72.5 (3.2)               |
| Elastic Net: Hazard Ratio (P-value, 95% CI)         | 1.08 (0.38, 0.91-1.27)  | 1.00 (0.96, 0.79-1.28)   |
| BLUP: mean (SD) <sup>3</sup>                        | 77.3 (3.3)              | 72.5 (2.8)               |
| BLUP: Hazard Ratio (P-value, 95% CI)                | 1.20 (0.066, 0.99-1.46) | 1.25 (0.12, 0.95-1.64)   |

3  
4  
5  
6  
7  
8  
9

<sup>1</sup> Mean (predicted) age and its standard deviation.

<sup>2</sup> Hazard Ratio, P-value and 95% confidence interval from the survival analysis based on the predicted age. Hazard Ratios were expressed per 5 years of methylation age acceleration.

<sup>3</sup> Both results of Elastic Net and BLUP were based on the age predictor with largest training sample size (sample size = 10,411 for LBC1936 and sample size = 12,710 for LBC1921).

1  
2

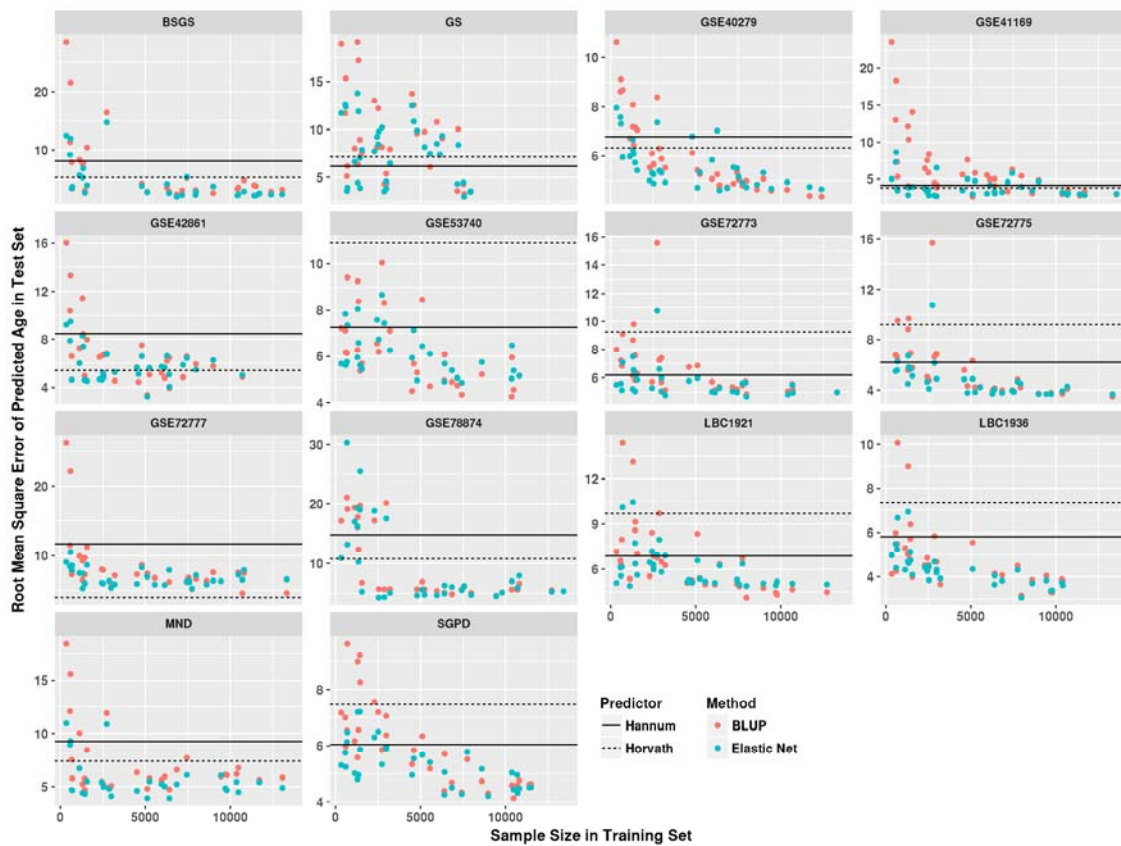

3

4 Figure 1: RMSE in test data sets. Each point represents the RMSE of the test result based on  
5 predictors with different sample size and methods. Prediction results from Horvath are  
6 marked as black dash line, and black solid line represents prediction result from Hannum's  
7 age predictor.

8

1

2

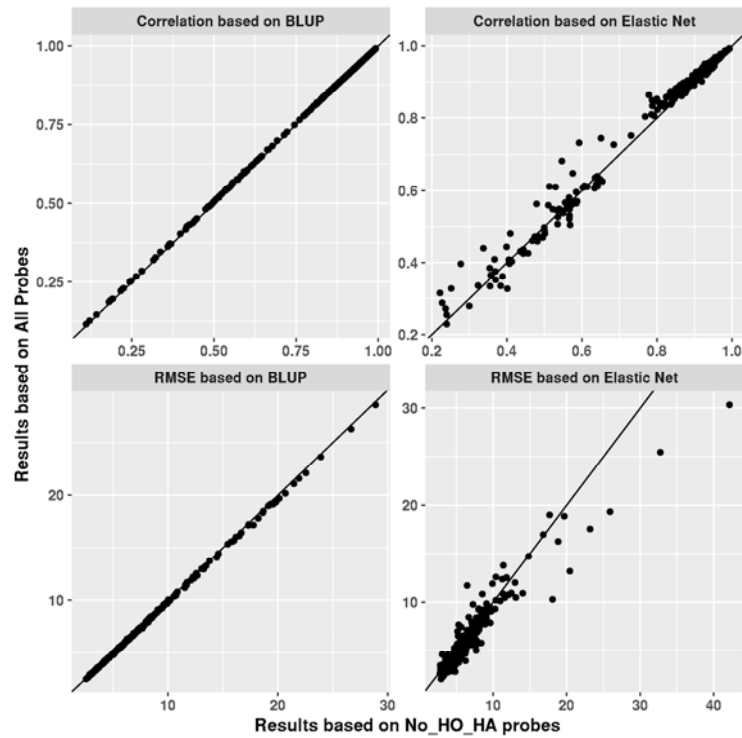

3

4 Figure 2: Comparison of prediction performance between the full probe set and probe set  
5 excluding probes from Hannum's and Horvath's Age predictors, using BLUP and Elastic Net.  
6 Each point represents prediction accuracy of each cohort based on predictors built from  
7 different training data sets.

8

9

10

1  
2

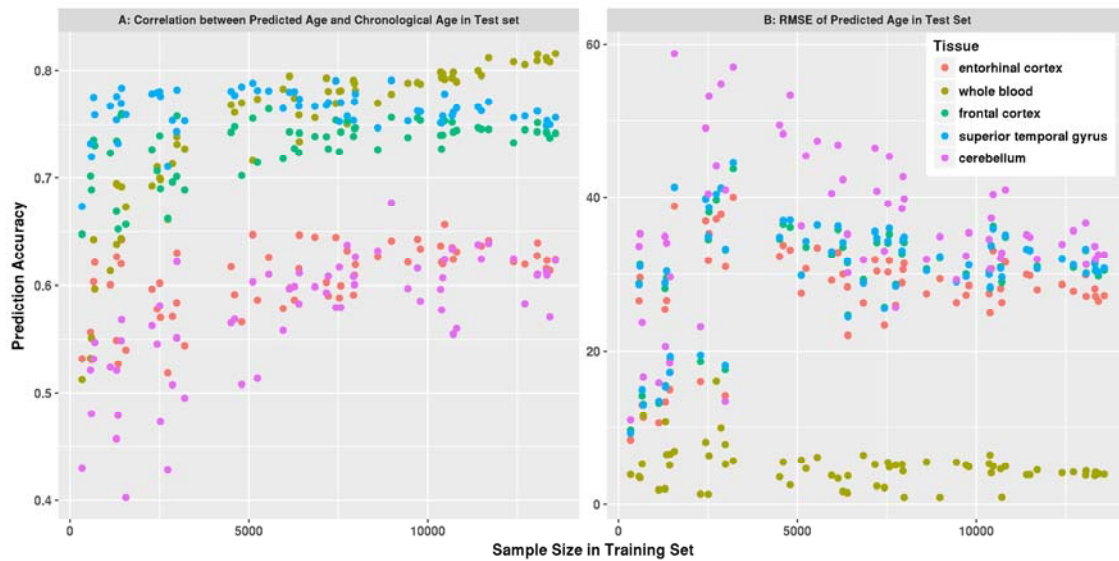

3

4 Figure 3: A: Correlation between predicted age and chronological age for the samples in  
5 cohort GSE59685, which contains brain and blood samples from the same individuals. Each  
6 point represents the correlation between the predicted age and chronological age based on  
7 age predictors with different training samples. Each colour represents one cell type. B:  
8 RMSE of predicted age for the samples in cohort GSE59685 that contains brain and blood  
9 samples from the same individuals.

10

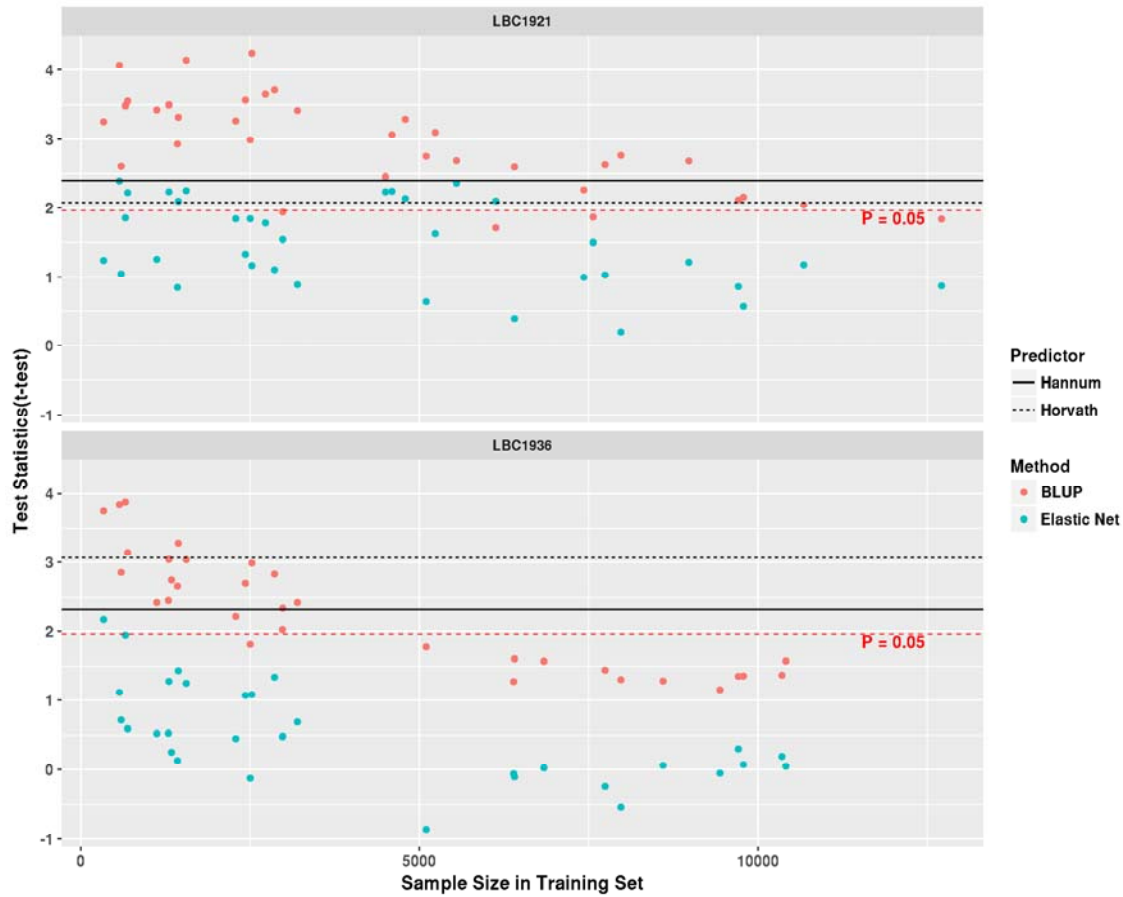

1  
2 Figure 4: Relationship between the training sample size and the test statistics from the  
3 association between  $\Delta_{age}$  and mortality. Each point represents the test statistic from the  
4 survival analysis based on the predicted ages from predictors with different training sample  
5 sizes.

6
